# Supplementary material for: Quantifying Variation in Bacterial Reproductive Fitness: a High-Throughput Method
Source: PubMed Central journal article supplement (PMC7857537; doi:10.1128/msystems.01323-20), 2021-02-02
Supplement: mSystems.01323-20-sf001.pdf [file mSystems.01323-20-sf001.pdf]

**A**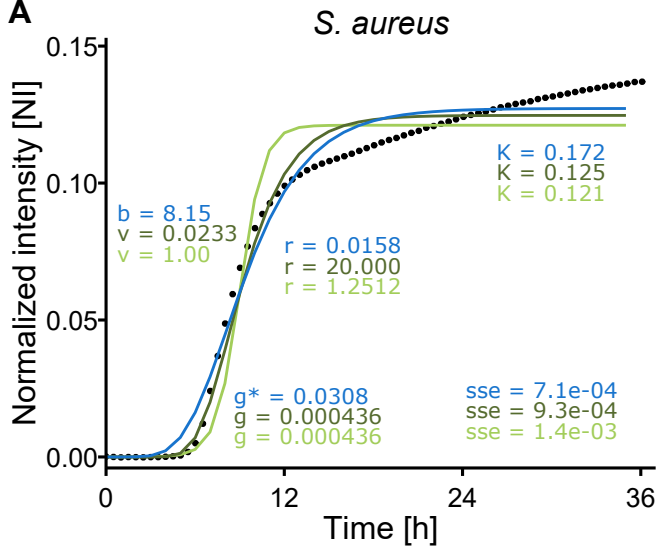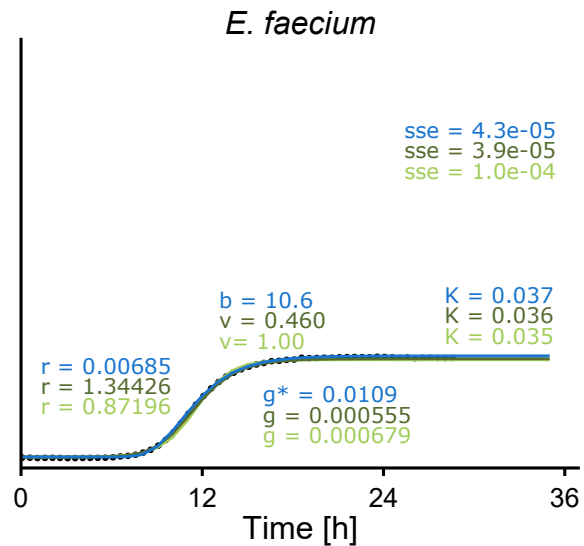

Model fit: — Standard logistic — Generalized logistic — Gompertz

**B**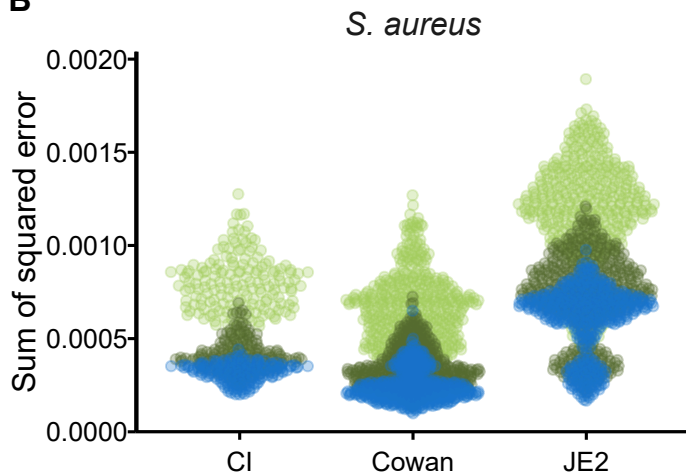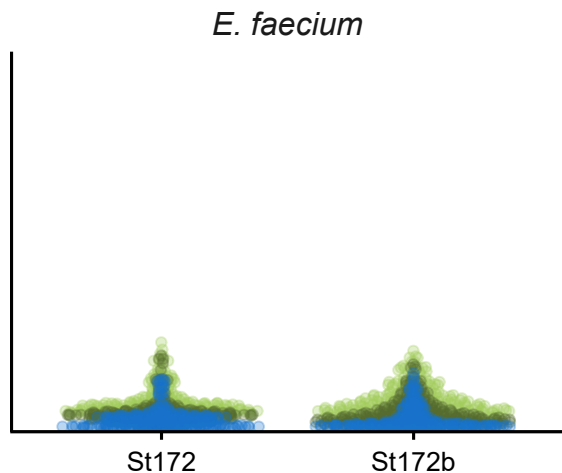

Strain
