# Supplementary material for: Quantifying Variation in Bacterial Reproductive Fitness: a High-Throughput Method
Source: PubMed Central journal article supplement (PMC7857537; doi:10.1128/msystems.01323-20), 2021-02-02
Supplement: mSystems.01323-20-sf006.pdf [file mSystems.01323-20-sf006.pdf]

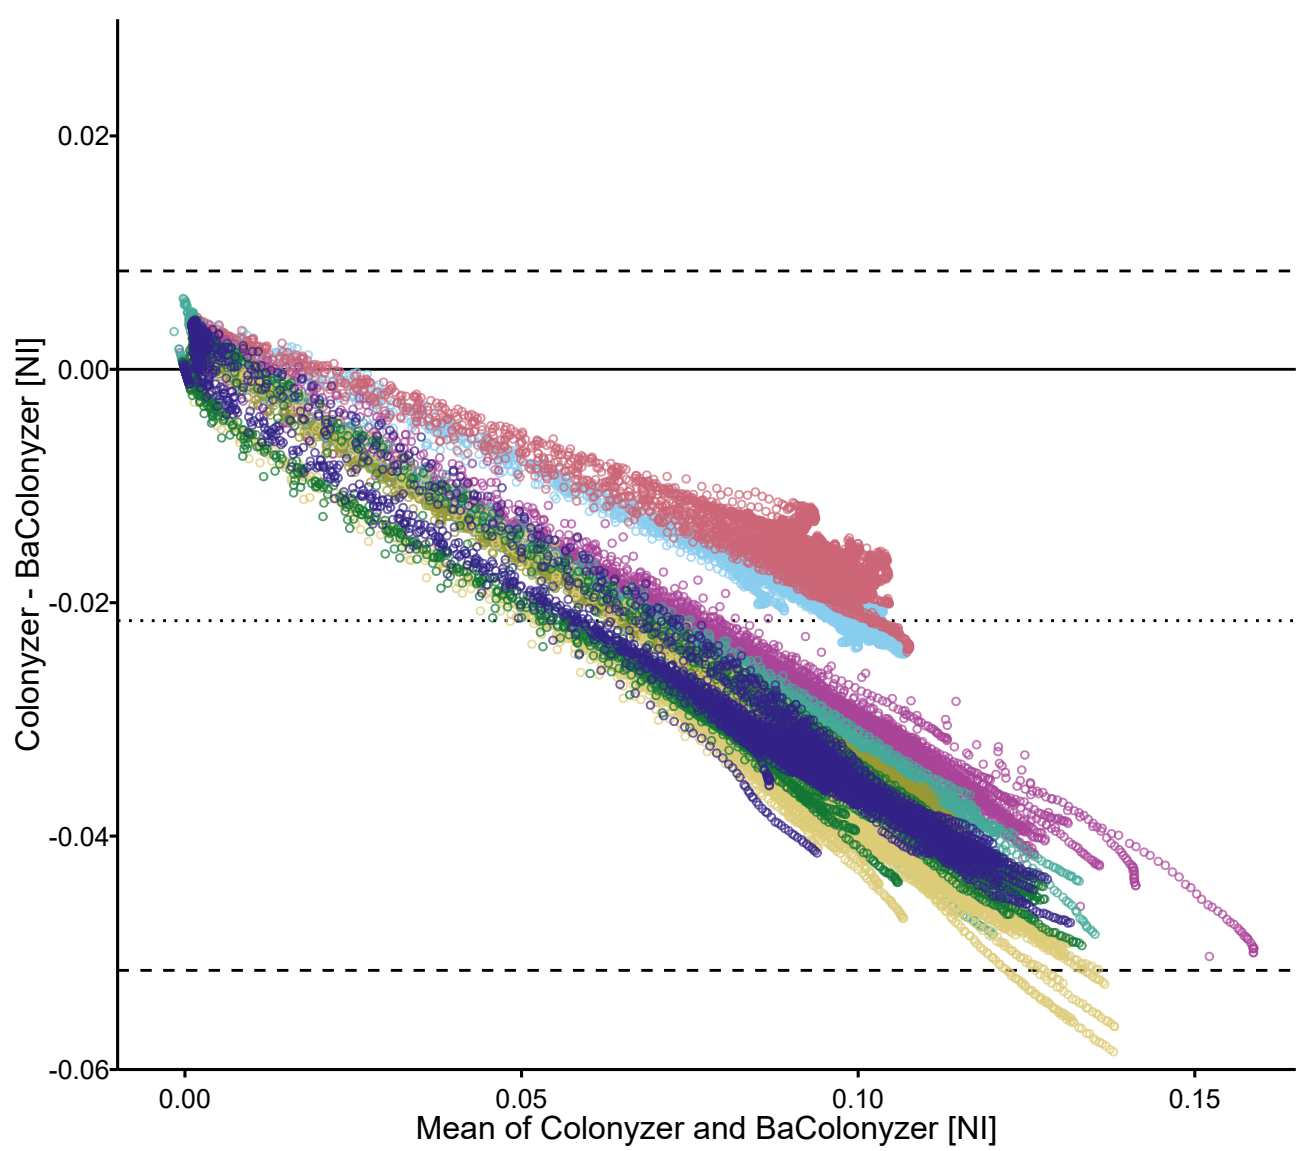

- Cowan, Solo, R1
- Grid, R1
- Grid, R3
- JE2, Solo, R2
- Cowan, Solo, R3
- Grid, R2
- JE2, Solo, R1
- JE2, Solo, R3
